# Supplementary material
Source: PubMed Central journal article supplement (PMC1905898)
Supplement: 7401000-s1.pdf [file 7401000-s1.pdf]

## SUPPLEMENTARY INFORMATION

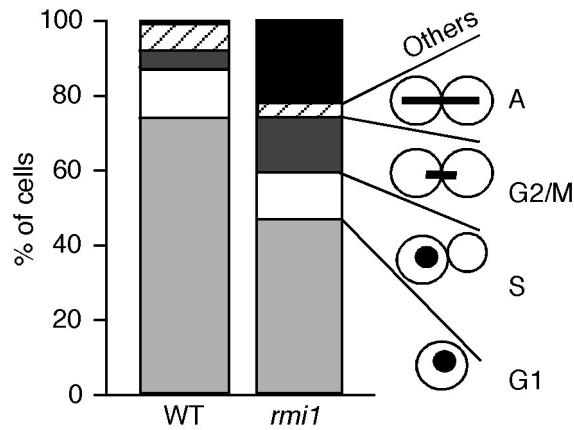

Fig S1 Abnormality of spindle morphology in *rmi1* cells. Log phase cultures of wild type (yMP10381) and *rmi1* (SCRr1) cells were fixed in formaldehyde and microtubules were visualized using anti- $\alpha$ -tubulin immunofluorescence. A total of one hundred cells were scored for spindle morphology in five categories. Others mean aberrant spindle structures.
