# Supplementary material
Source: PubMed Central journal article supplement (PMC1905898)
Supplement: 7401000-s3.pdf [file 7401000-s3.pdf]

## SUPPLEMENTARY INFORMATION

Table S1

List of yeast strains used in this study

| Strain              | Genotype                                                                                                             | Reference                     |
|---------------------|----------------------------------------------------------------------------------------------------------------------|-------------------------------|
| <b>YK402a</b>       | <i>MATa ade2-1 can1-100 his3-11,15 leu2-3,112 trp1-1 ura3-1</i><br><br><i>RAD5 bar1::hisG</i>                        | Araki <i>et al</i> , 2003     |
| <b>YK402ar1</b>     | <b>YK402a</b> genotype but <i>rmi1[]::KANMX4</i>                                                                     | This study                    |
| <b>YK402am2</b>     | <b>YK402a</b> genotype but <i>mad2[]::HPHMX4</i>                                                                     | This study                    |
| <b>YK402ar1m2</b>   | <b>YK402a</b> genotype but <i>rmi1[]::KANMX4 mad2[]::TRP1</i>                                                        | This study                    |
| <b>YK402aSCC1</b>   | <b>YK402a</b> genotype but <i>SCC1-13Myc::KANMX4</i>                                                                 | This study                    |
| <b>YK402aSCC1r1</b> | <b>YK402a</b> genotype but <i>SCC1-13MYC::KANMX4</i><br><br><i>rmi1[]::HPHMX4</i>                                    | This study                    |
| <b>yMP10381</b>     | <i>MATa ade2 ade3-130 leu2 trp1 ura3 cyh2 SCR::URA3</i>                                                              | Paulovich <i>et at</i> , 1998 |
| <b>SCRr1</b>        | <b>yMP10381</b> genotype but <i>rmi1[]::KANMX4</i>                                                                   | This study                    |
| <b>YPH1477</b>      | <i>MATa ade2-1 trp1-1 can1-100 his3-11,15 leu2::LEU2tetR-</i><br><br><i>GFP ura3::3xURA3tetO112 PDS1-13MYC::TRP1</i> | Mayer <i>et al</i> , 2001     |

|                     |                                                                                                                            |                           |
|---------------------|----------------------------------------------------------------------------------------------------------------------------|---------------------------|
| <b>YPH1477c18</b>   | <b>YPH1477</b> genotype but <i>ctf18</i> :: <i>HPHMX4</i>                                                                  | This study                |
| <b>YPH1477r1</b>    | <b>YPH1477</b> genotype but <i>rmi1</i> :: <i>KANMX4</i>                                                                   | This study                |
| <b>YPH1477s1</b>    | <b>YPH1477</b> genotype but <i>sgs1</i> :: <i>AURI-C</i>                                                                   | This study                |
| <b>YPH1477t3</b>    | <b>YPH1477</b> genotype but <i>top3</i> :: <i>KANMX4</i>                                                                   | This study                |
| <b>YPH1477r51</b>   | <b>YPH1477</b> genotype but <i>rad51</i> :: <i>KANMX4</i>                                                                  | This study                |
| <b>YPH1477r1s1</b>  | <b>YPH1477</b> genotype but <i>rmi1</i> :: <i>KANMX4</i> <i>sgs1</i> :: <i>AURI-C</i>                                      | This study                |
| <b>YPH1477t3s1</b>  | <b>YPH1477</b> genotype but <i>top3</i> :: <i>KANMX4</i> <i>sgs1</i> :: <i>AURI-C</i>                                      | This study                |
| <b>YPH1477r1t3</b>  | <b>YPH1477</b> genotype but <i>rmi1</i> :: <i>HPHMX4</i> <i>top3</i> :: <i>KANMX4</i>                                      | This study                |
| <b>YPH1477r1r51</b> | <b>YPH1477</b> genotype but <i>rmi1</i> :: <i>HPHMX4</i><br><br><i>rad51</i> :: <i>KANMX4</i>                              | This study                |
| <b>YPH1477b1</b>    | <b>YPH1477</b> genotype but <i>bar1</i> :: <i>HPHMX4</i>                                                                   | This study                |
| <b>YPH1477b1r1</b>  | <b>YPH1477</b> genotype but <i>bar1</i> :: <i>HPHMX4</i><br><br><i>rmi1</i> :: <i>KANMX4</i>                               | This study                |
| <b>Y819</b>         | <b>MaTa</b> <i>trp1-1:lacO-TRP1-LEU2</i> <i>his3-11,15:lacR::GFP-</i><br><br><i>HIS3 leu2-3,112 ura3-1 ade2-1 can1-100</i> | Mayer <i>et al</i> , 2001 |
| <b>Y819r1</b>       | <b>Y819</b> genotype but <i>rmi1</i> :: <i>KANMX4</i>                                                                      | This study                |

|                  |                                                           |                           |
|------------------|-----------------------------------------------------------|---------------------------|
| <b>982-6a</b>    | <i>MaTa bar1 trp1 ura3-52 gal1</i>                        | Stead <i>et al</i> , 2003 |
| <b>982-6ar1</b>  | <b>982-6a</b> genotype but <i>rmi1</i> □:: <i>KANMX4</i>  | This study                |
| <b>1355-1a</b>   | <i>MaTa smc1-2::LEU2 trp1 leu2-3,112 bar1 gal1</i>        | Stead <i>et al</i> , 2003 |
| <b>1355-1ar1</b> | <b>1355-1a</b> genotype but <i>rmi1</i> □:: <i>KANMX4</i> | This study                |

## References

Araki Y, Kawasaki Y, Sasanuma H, Tye BK, Sugino A (2003) Budding yeast *mcm10/dna43* mutant requires a novel repair pathway for viability. *Genes Cells* **8**: 465-

480

Mayer ML, Gygi SP, Aebersold R, Hieter P (2001) Identification of RFC (Ctf18p, Ctf8p,

Dcc1p): an alternative RFC complex required for sister chromatid cohesion in *S.*

*cerevisiae*. *Mol Cell* **7**: 959-970

Paulovich AG, Armour CD, Hartwell LH (1998) The *Saccharomyces cerevisiae* RAD9,

RAD17, RAD24 and MEC3 genes are required for tolerating irreparable, ultraviolet-

induced DNA damage. *Genetics* **150**: 75-93

Stead K, Aguilar C, Hartman T, Drexel M, Meluh P, Guacci V (2003) Pds5p regulates the maintenance of sister chromatid cohesion and is sumoylated to promote the dissolution of cohesion. *J Cell Biol* **163**: 729-741
